# Supplementary material
Source: PubMed Central journal article supplement (PMC2823415)
Supplement: supp_M109.044131_SupplFig1.pdf [file supp_M109.044131_SupplFig1.pdf]

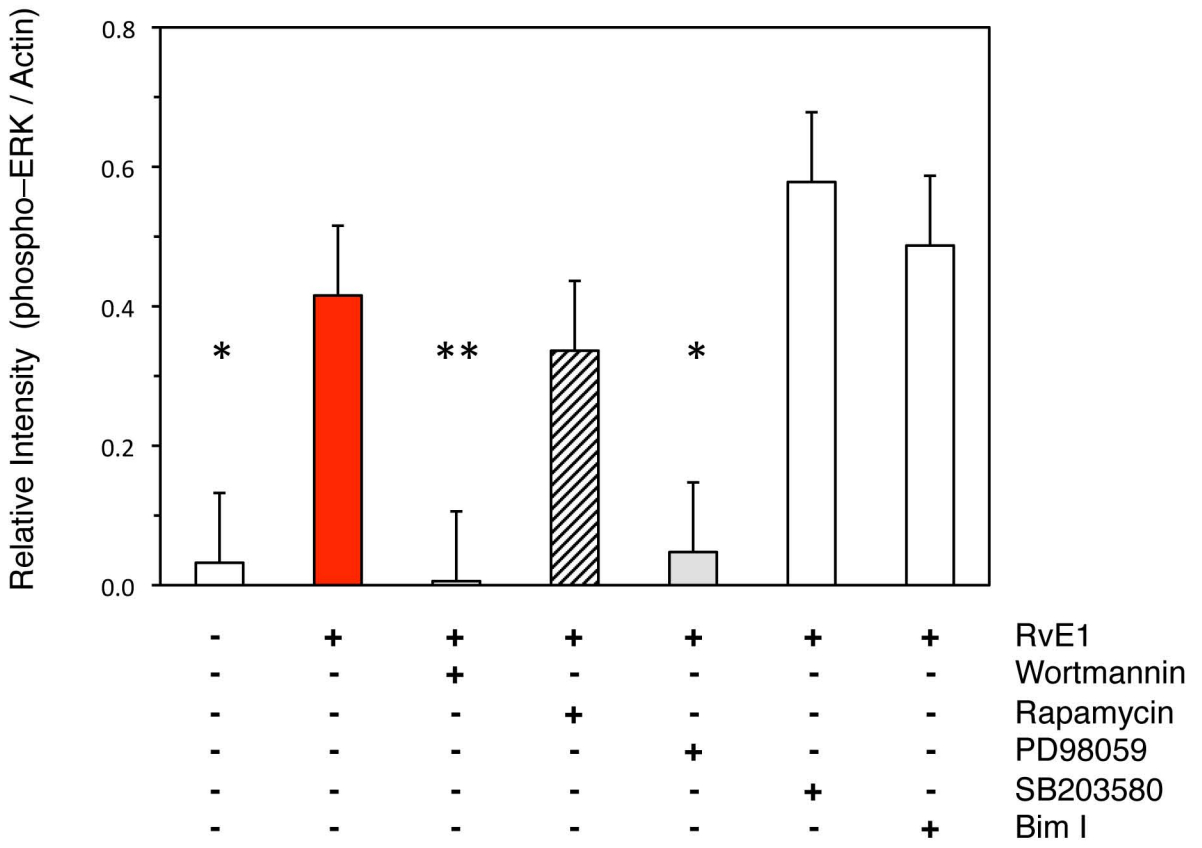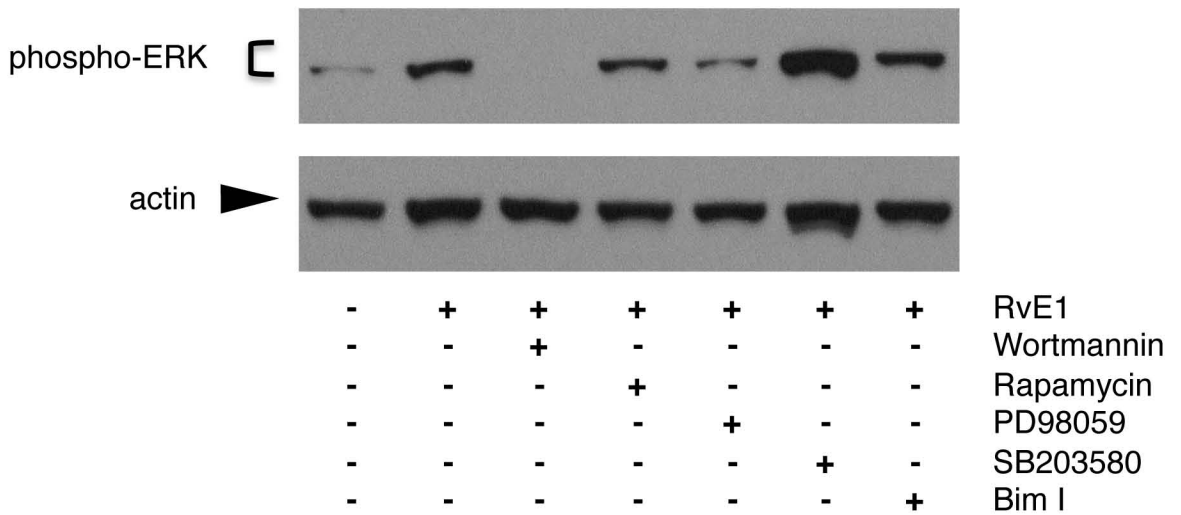

**Supplemental Figure 1**

Supplemental Fig. 1.

RvE1 regulates phosphorylation of ERK in human macrophages via ChemR23.

Reduction of RvE1-enhanced ERK phosphorylation by pharmacological inhibitors.

Whole cell lysates were extracted from human macrophages incubated with wortmannin (200 nM), rapamycin (20 nM), PD98059 (50  $\mu$ M), SB203580 (10  $\mu$ M), or Bim I (1  $\mu$ M) for 15 min followed by co-incubation with RvE1 (10 nM, 15 min, 37°C), and were analyzed by Western blotting with phospho-ERK (Thr<sup>202/204</sup>) Ab. The bar graph summarizes the relative intensity of ERK phosphorylation. Results represent the mean values  $\pm$  SEM for 5 separate experiments (\*, P < 0.05; \*\*, P < 0.01 when compared to RvE1 stimulus).
